# Supplementary material for: Esterification of Oleic Acid for Biodiesel Production Using a Semibatch Atomization Apparatus
Source: Hindawi journal article supplement (doi:10.1155/2023/6957812), 2023-10-30
Supplement: f1 [file 6957812.f1.docx]

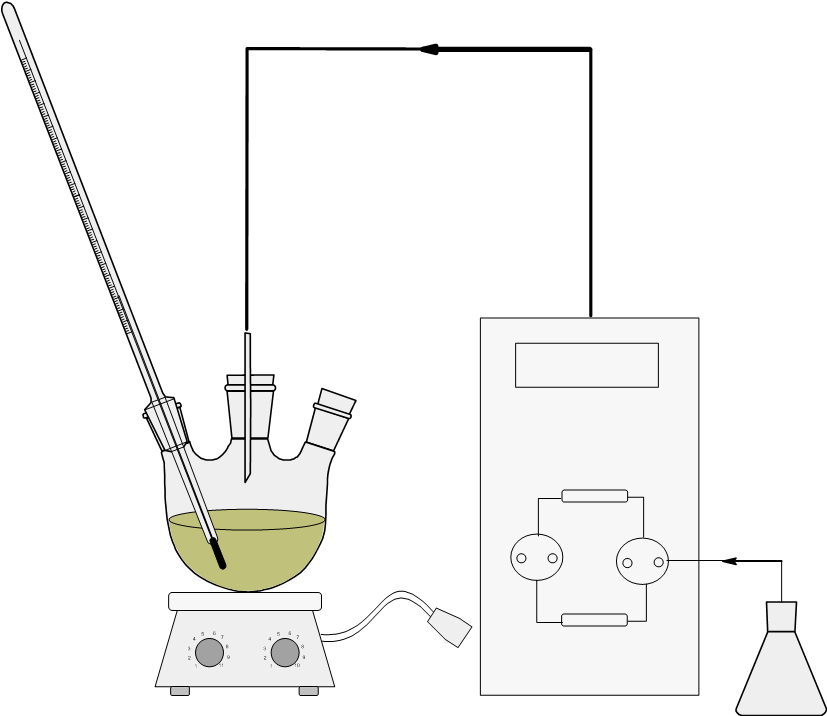


Figure S1 Dripping reaction system for biodiesel production in semi-batch regime.


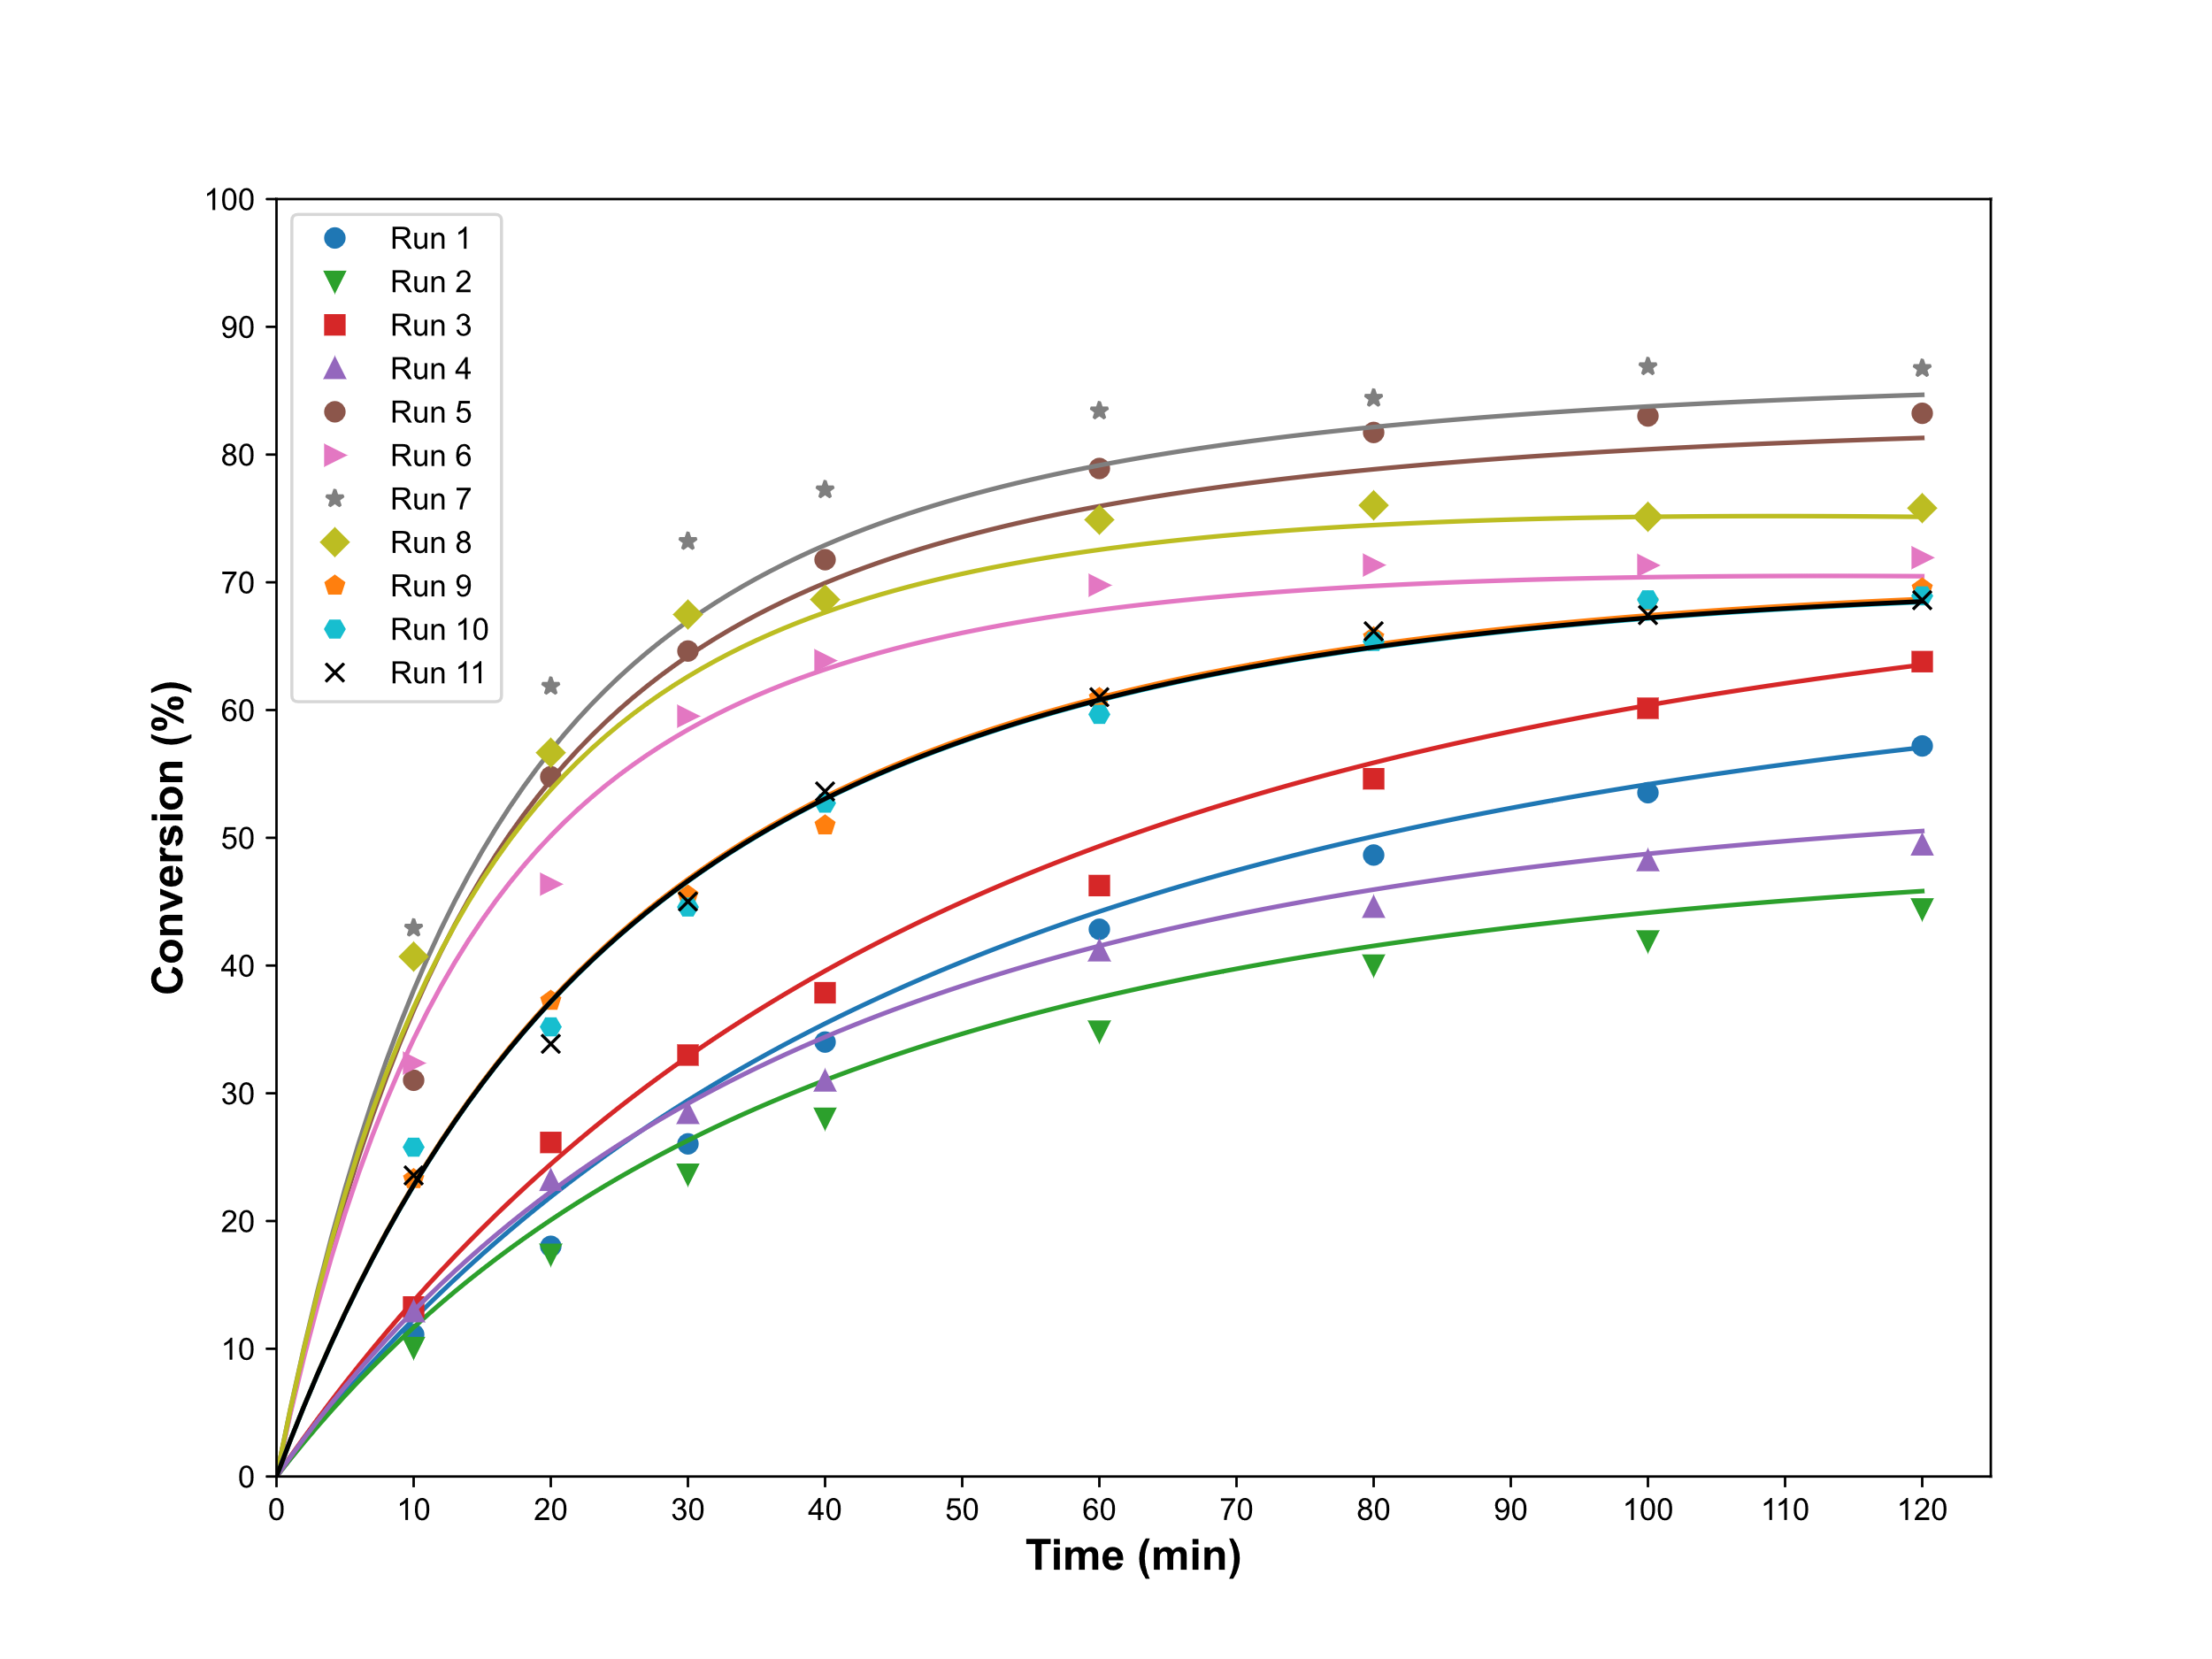


Figure S2: Simulated profiles of conversion of oleic acid in the esterification experiments using an atomization apparatus. The experimental and predicted data are presented as scatters and lines, respectively. The simulations were generated after the estimation of parameters *Kc* and *kd’* in each run. The parameters *k0* and *Ea* were equal to 6.51×106 L.mol-1.s-1 and 59.06 KJ/mol in all runs.


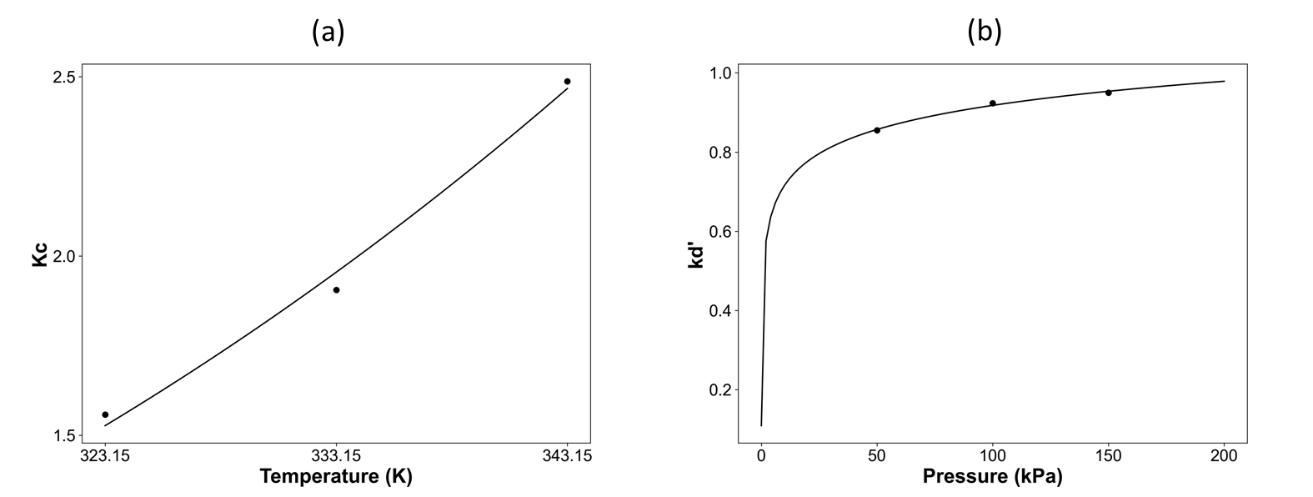


Figure S3: Correlations between the estimated parameters and the input variables in the second estimation approach. The values of *Kc* and *kd’* were obtained from the mean value at each temperature and pressure respectively.
